# Supplementary material for: Host-Guest Complexation of Oxaliplatin and Para-Sulfonatocalix[n]Arenes for Potential Use in Cancer Therapy
Source: PubMed Central journal article supplement (PMC7765097; doi:10.3390/molecules25245926), 2020-12-14
Supplement: molecules-25-05926-s001.pdf [file molecules-25-05926-s001.pdf]

# Electronic Supplementary Information

## Host-guest complexation of oxaliplatin and *para*-sulfonatocalix[n]arenes for potential use in cancer therapy

Sherif Ashraf Fahmy<sup>1</sup>, Fortuna Ponte<sup>2</sup>, Iten M. Fawzy<sup>3</sup>, Emilia Sicilia<sup>2</sup>, Udo Bakowsky<sup>4\*</sup> and Hassan M. E. Azzazy<sup>1\*</sup>

<sup>1</sup>Department of Chemistry, School of Sciences & Engineering, The American University in Cairo, AUC Avenue, PO. Box 74, New Cairo 11835, Egypt; sheriffahmy@aucegypt.edu

<sup>2</sup> Department of Chemistry and Chemical Technologies, University of Calabria, Arcavacata di Rende, 87036, Italy

<sup>3</sup>Pharmaceutical Chemistry Department, Faculty of Pharmaceutical Sciences and Pharmaceutical Industries, Future University in Egypt, Cairo 12311, Egypt; iten.mamdouh@fue.edu.eg

<sup>4</sup> Department of Pharmaceutics and Biopharmaceutics, University of Marburg, Robert- Koch-Str. 4, 35037 Marburg, Germany.

\* Correspondence: ubakowsky@aol.com (U.B.); [hazzazy@aucegypt.edu](mailto:hazzazy@aucegypt.edu) (H.M.E.-S.A.); Tel.: +49-(0)-6421-28-2-58-84 (U.B.); +2 02 2615 2559; Fax: +2 02 2795 7565 (H.M.E.-S.A.)

**A**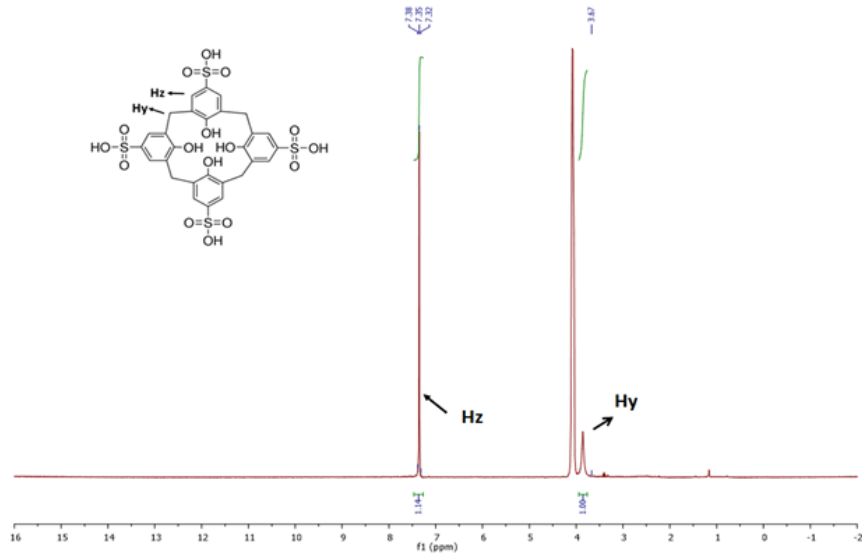**B**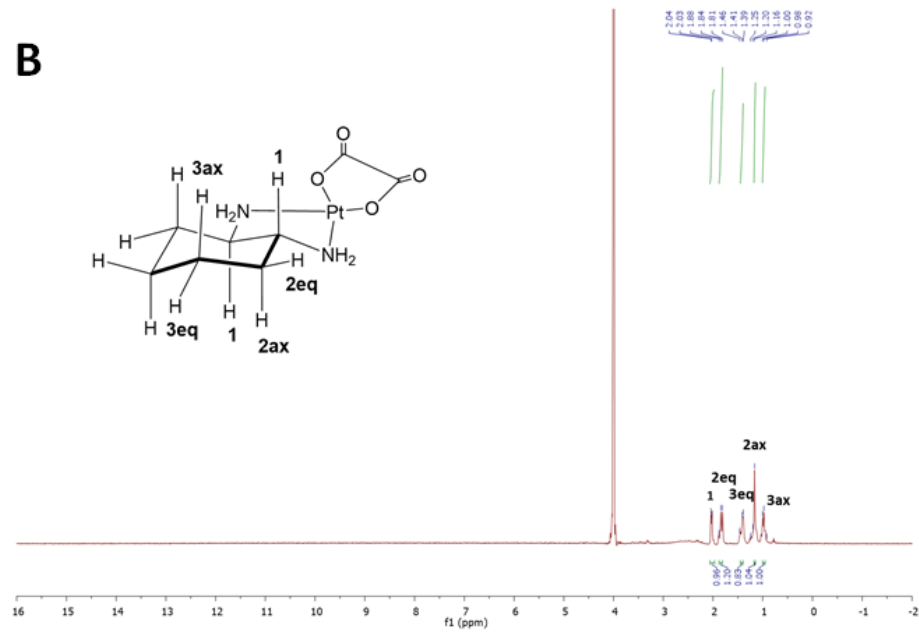**C**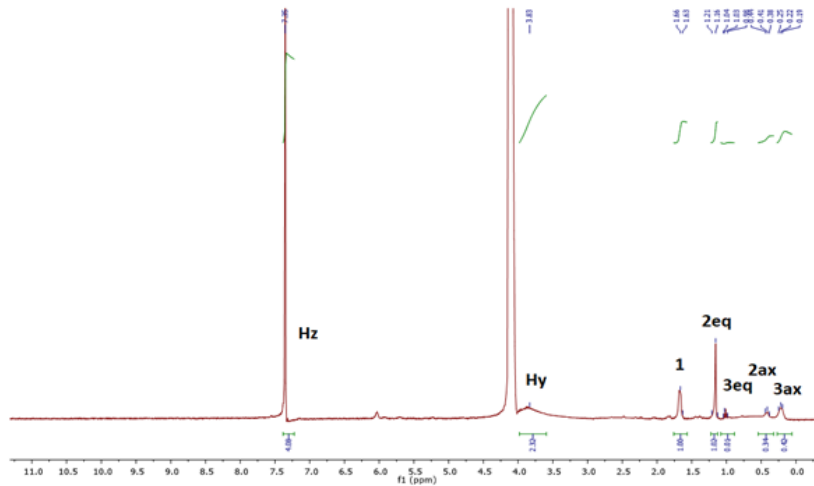

**Figure S1.**  $^1\text{H}$ NMR spectra of (A) *p*-SC4 alone, (B) oxaliplatin alone, and (C) equimolar ratio of amount of oxaliplatin and *p*-SC4. Structures of oxaliplatin and *p*-SC4 are shown with appropriate protons labeled.

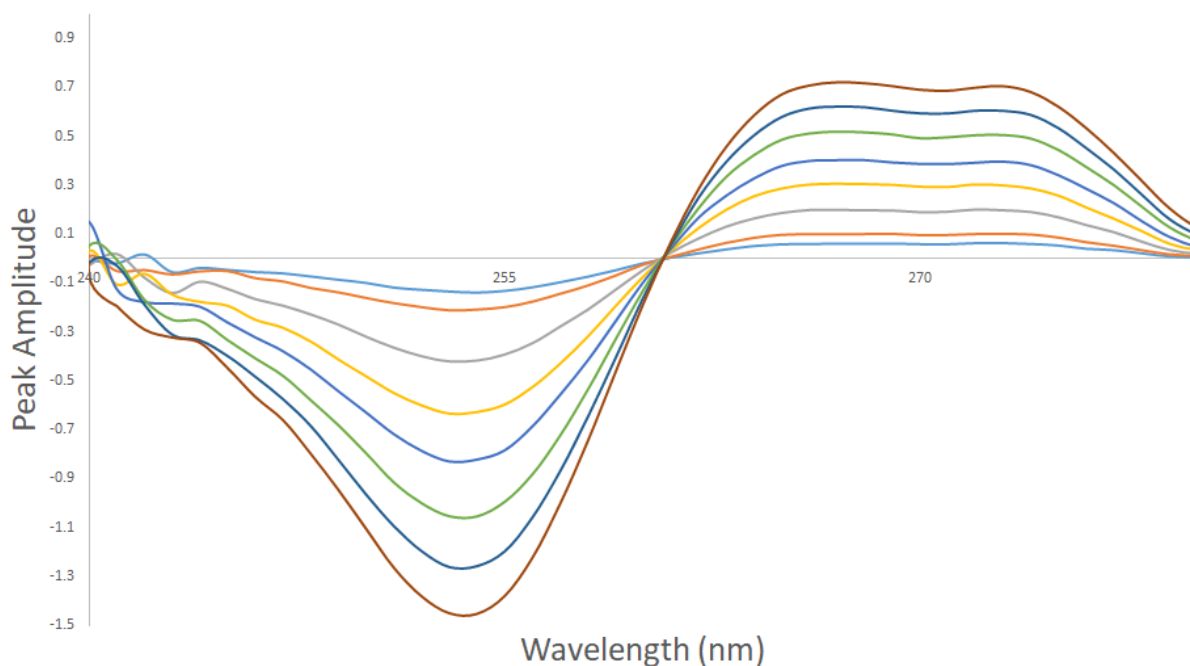

**Figure S2** First derivative of ratio spectra of the mixtures containing successively increasing concentrations of oxaliplatin (ranging from 0.01-0.21 mM) and a fixed concentration of 0.2 mM *p*-SC4 all in distilled water using the spectrum of 0.2 mM of *p*-SC4 as a divisor.

**Table S1.** ADMET study results of oxaliplatin, oxaliplatin/*p*-SC4, and oxaliplatin/*p*-SC6 complexes as performed by Discovery Studio 4.0.

ADMET values and descriptors are provided below.

|                            | Aqueous Solubility Level | Human Intestinal Absorption | Hepatotoxicity | CYP-2D6 | BBB (Blood Brain Barrier Penetration Level) | PPB (Plasma Protein Binding) |
|----------------------------|--------------------------|-----------------------------|----------------|---------|---------------------------------------------|------------------------------|
| Oxaliplatin                | 3                        | 0                           | 1              | 0       | 3                                           | 0                            |
| Oxaliplatin/ <i>p</i> -SC4 | 5                        | 3                           | 1              | 0       | 4                                           | 1                            |
| Oxaliplatin/ <i>p</i> -SC6 | 5                        | 3                           | 1              | 0       | 4                                           | 1                            |

**Discovery Studio 4.0 ADMET values and descriptors**

| Discovery Studio 4.0 Descriptors | Aqueous Solubility Level |                                      |                                                           | Human Intestinal Absorption |                     | Hepatotoxicity |             | CYP-2D6 |               | BBB (Blood Brain Barrier Penetration Level) |                                                               | PPB (Plasma Protein Binding) |                 |
|----------------------------------|--------------------------|--------------------------------------|-----------------------------------------------------------|-----------------------------|---------------------|----------------|-------------|---------|---------------|---------------------------------------------|---------------------------------------------------------------|------------------------------|-----------------|
|                                  | Level                    | Value                                | Description                                               | Level                       | Description         | Level          | Description | Level   | Description   | Level                                       | Description                                                   | Level                        | Description     |
|                                  | 0                        | log (molar solubility) < -8.0        | Extremely low                                             | 0                           | Good absorption     | 0              | Non-toxic   | 0       | Non-inhibitor | 0                                           | Very High                                                     | 0                            | Binding is <90% |
|                                  | 1                        | -8.0 < log (molar solubility) < -6.0 | No, very low, but possible                                |                             |                     |                |             |         |               |                                             |                                                               |                              |                 |
|                                  | 2                        | -6.0 < log (molar solubility) < -4.0 | Yes, low                                                  | 1                           | Moderate absorption |                |             |         |               | 1                                           | High                                                          |                              |                 |
|                                  | 3                        | -4.0 < log (molar solubility) < -2.0 | Yes, good                                                 |                             |                     | 2              | Medium      |         |               |                                             |                                                               |                              |                 |
|                                  | 4                        | -2.0 < log (molar solubility) < 0.0  | Yes, optimal                                              | 2                           | Low absorption      | 1              | Toxic       | 1       | Inhibitor     | 3                                           | Low                                                           | 1                            | Binding is ≥90% |
|                                  | 5                        | 0.0 < log (molar solubility)         | No, too soluble                                           |                             |                     |                |             |         |               | 4                                           | Undefined                                                     |                              |                 |
|                                  | 6                        | -1000                                | Warning: molecules with one or more unknown AlogP98 types | 3                           | Very Low absorption |                |             |         |               | 5                                           | Warning: molecules with one or more unknown AlogP calculation | 2                            | Binding is ≥95% |

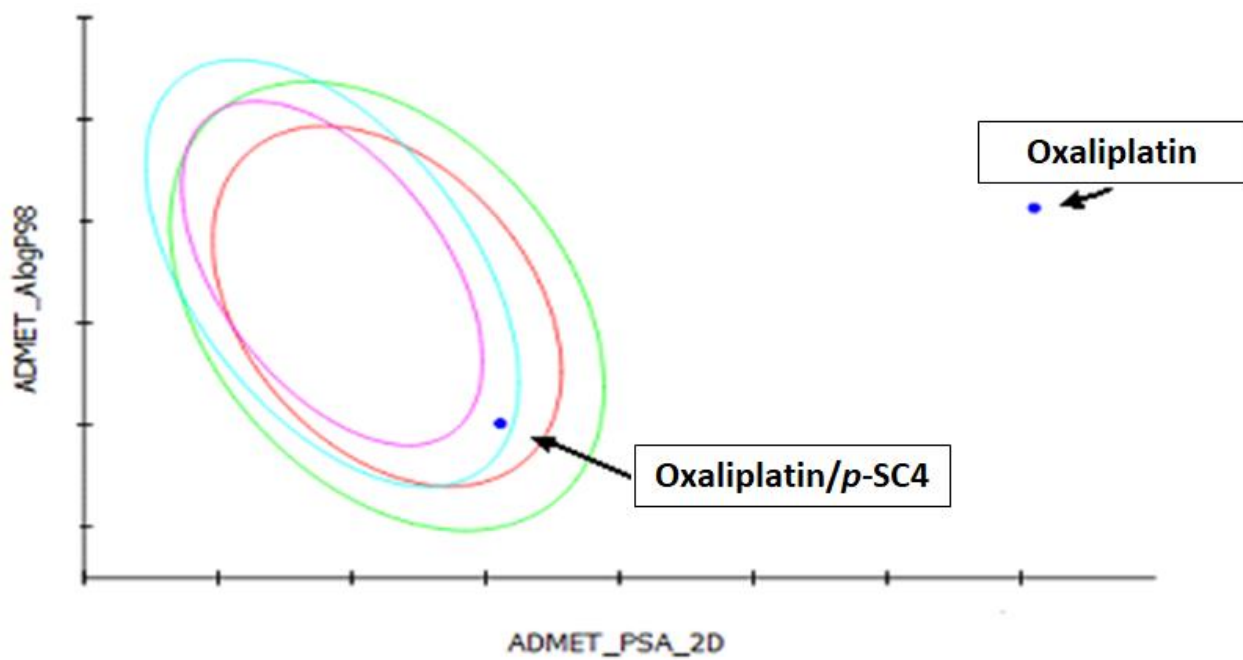

**Figure S3.** The shift in the biological properties between oxaliplatin alone and oxaliplatin/p-SC4 complex.

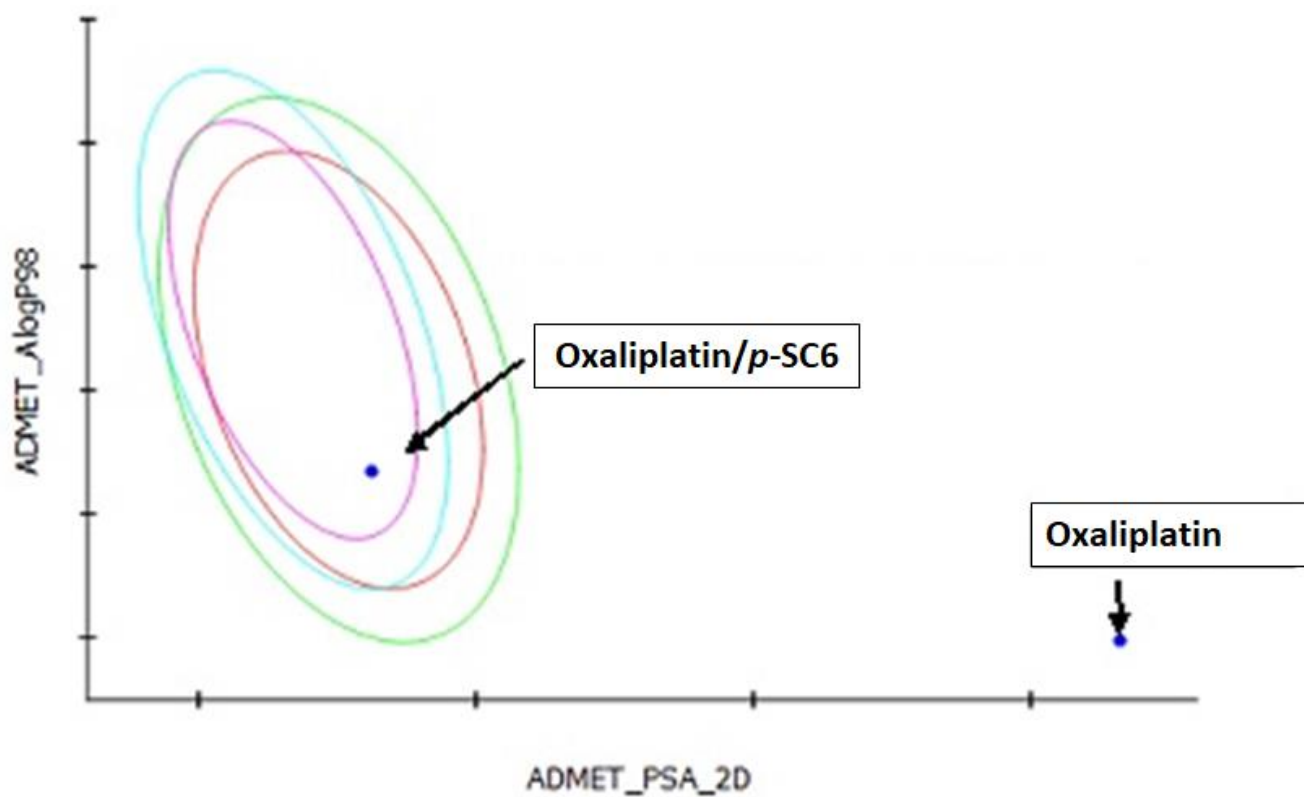

**Figure S4.** The shift in the biological properties between oxaliplatin alone and oxaliplatin in complex with SC6-calixarene.
